# Supplementary material for: Emission stability and reversibility of upconversion nanocrystals
Source: Royal Society of Chemistry journal article supplement (doi:10.1039/c6tc02990f), 2016-01-01
Supplement: c6tc02990f1.pdf [file c6tc02990f1.pdf]

## Supporting Information

### Title: Emission Stability and Reversibility of Upconversion

### Nanocrystals

Deming Liu<sup>1,2,3</sup>, Xiaoxue Xu<sup>1,2,3,\*</sup>, Fan Wang<sup>1,2,3</sup>, Jiajia Zhou<sup>3,4</sup>, Chao Mi, Lixin Zhang<sup>1</sup>,  
Yiqing Lu<sup>1</sup>, Chenshuo Ma<sup>1</sup>, Ewa Goldys<sup>1</sup>, Jun Lin<sup>3,5</sup>, and Dayong Jin<sup>1,2,3,\*</sup>

<sup>1</sup> Advanced Cytometry Labs, ARC Centre of Excellence for Nanoscale BioPhotonics, Macquarie University, Sydney, NSW, 2109, Australia;

<sup>2</sup> Institute for Biomedical Materials and Devices, Faculty of Science, University of Technology Sydney, NSW, 2007, Australia;

<sup>3</sup> Australian Research Council Research Hub for Integrated Device for End-user Analysis at Low-levels (IDEAL), Faculty of Science, University of Technology Sydney, NSW, 2007, Australia;

<sup>4</sup> College of Optical Science and Engineering, State Key Laboratory of Modern Optical Instrumentation, Zhejiang University, Hangzhou, 310027, P. R. China;

<sup>5</sup> State Key Laboratory of Rare Earth Resource Utilization, Changchun Institute of Applied Chemistry, Chinese Academy of Sciences, Changchun, 130022, P. R. China.

\* Email: [xiaoxue.xu@mq.edu.au](mailto:xiaoxue.xu@mq.edu.au); [dayong.jin@uts.edu.au](mailto:dayong.jin@uts.edu.au)

**Table S1** Table of expected and measured shell thickness. (The expected shell thickness was calculated based on the size of core nanocrystal, the amount of core and the amount of shell precursors; the measured shell thickness was calculated by comparing the size difference between the core and core-shell nanocrystals.)

| Sample                                                                                   | Core – shell with 1.7 nm shell | Core – shell with 2.5 nm shell | Core – shell with 4.5 nm shell | Core – shell with 8.0 nm shell |
|------------------------------------------------------------------------------------------|--------------------------------|--------------------------------|--------------------------------|--------------------------------|
| Amount of NaYF <sub>4</sub> :Yb,Er core (mmol)                                           | 0.2                            | 0.2                            | 0.2                            | 0.2                            |
| Amount of $\alpha$ -NaYF <sub>4</sub> seeds as shell precursor (mmol)                    | 0.1                            | 0.2                            | 0.4                            | 0.8                            |
| Average size of NaYF <sub>4</sub> :Yb,Er cores (nm)                                      | 24.1                           | 24.1                           | 24.1                           | 24.1                           |
| Expected average size of the core-shell NaYF <sub>4</sub> :Yb,Er@ NaYF <sub>4</sub> (nm) | 27.4                           | 30.5                           | 34.9                           | 41.2                           |
| Measured average size of the core-shell NaYF <sub>4</sub> :Yb,Er@NaYF <sub>4</sub> (nm)  | 27.1                           | 28.9                           | 33.2                           | 40.1                           |
| Expected average thickness of the shell (nm)                                             | 1.65                           | 3.15                           | 5.35                           | 8.10                           |
| Measured average thickness of the shell (nm)                                             | 1.5                            | 2.5                            | 4.5                            | 8.0                            |

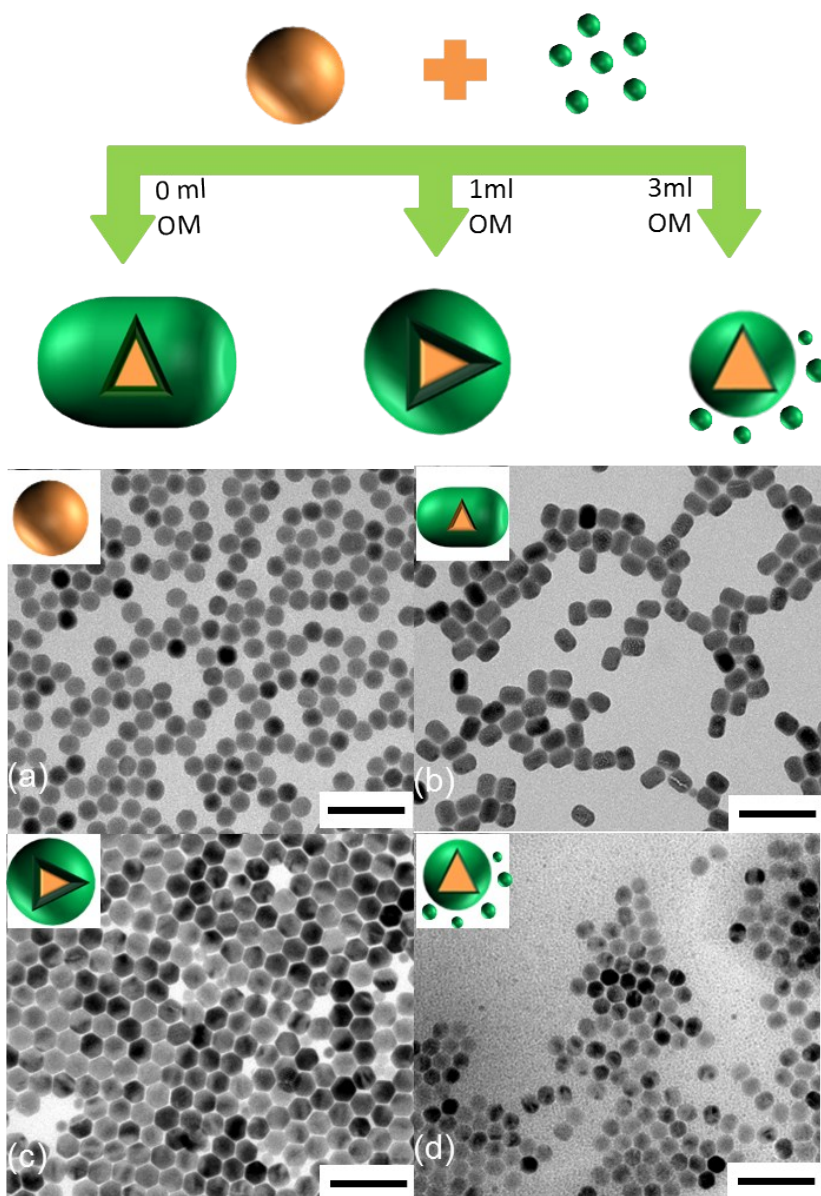

**Figure S1** Schematics of controlled growth of homogeneous shells by adjusting the amount of oleylamine (OM). TEM images of core (a) and core-shell UCNPs synthesized with 0 ml, 1ml and 3ml OM, at the same reaction temperature, reaction time, and the same amounts of 5 mL OA and 8 mL ODE.

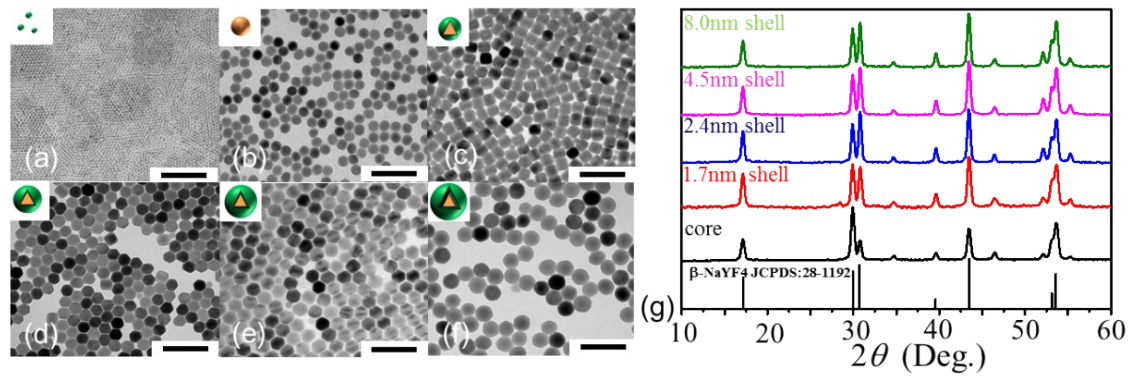

**Figure S2** Materials characterization. TEM images of a-NaYF<sub>4</sub> shell precursor (a), NaYF<sub>4</sub>:Er,Yb core (b), and NaYF<sub>4</sub>:Er,Yb@NaYF<sub>4</sub> core-shell UCNPs with different shell thickness, 1.5 nm (c), 2 nm (d), 2.5 (e) and 4.0 nm (f); XRD spectra of core and core-shell UCNPs (g) (Scale bar: 50 nm)

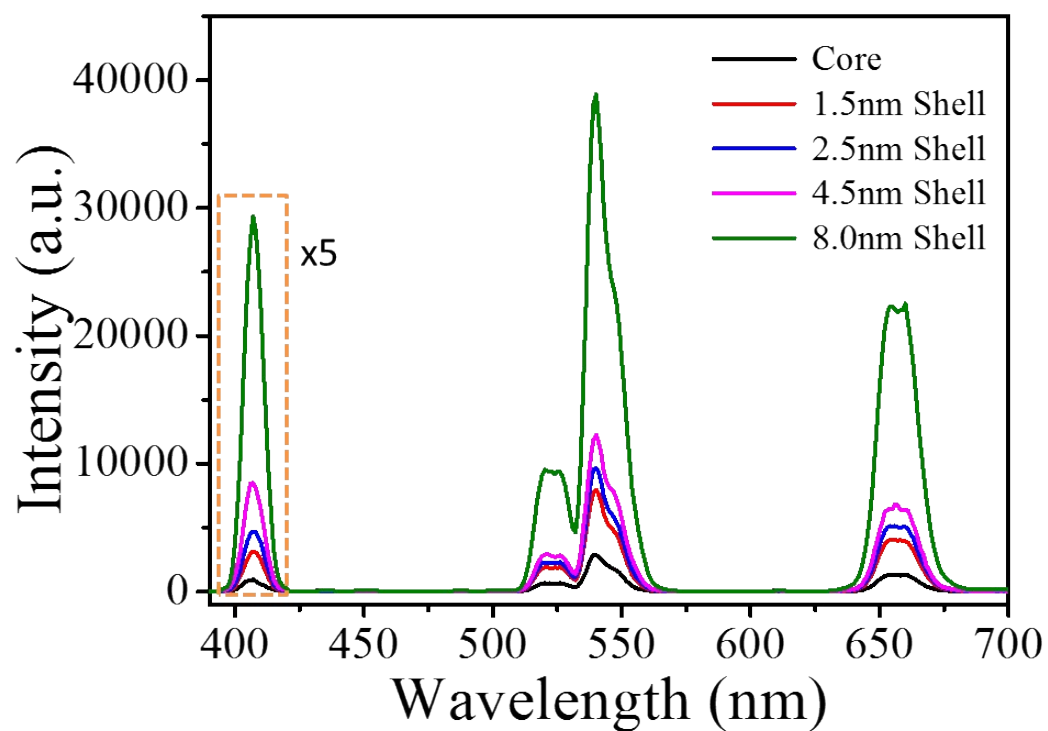

**Figure S3** Luminescence spectra to quantify the enhancement by different thickness of shells. Luminescence spectrum of core-only and core-shell UCNP under 200 mW 980 nm laser. The violet emission band was amplified by 5 times for a better revisualization.

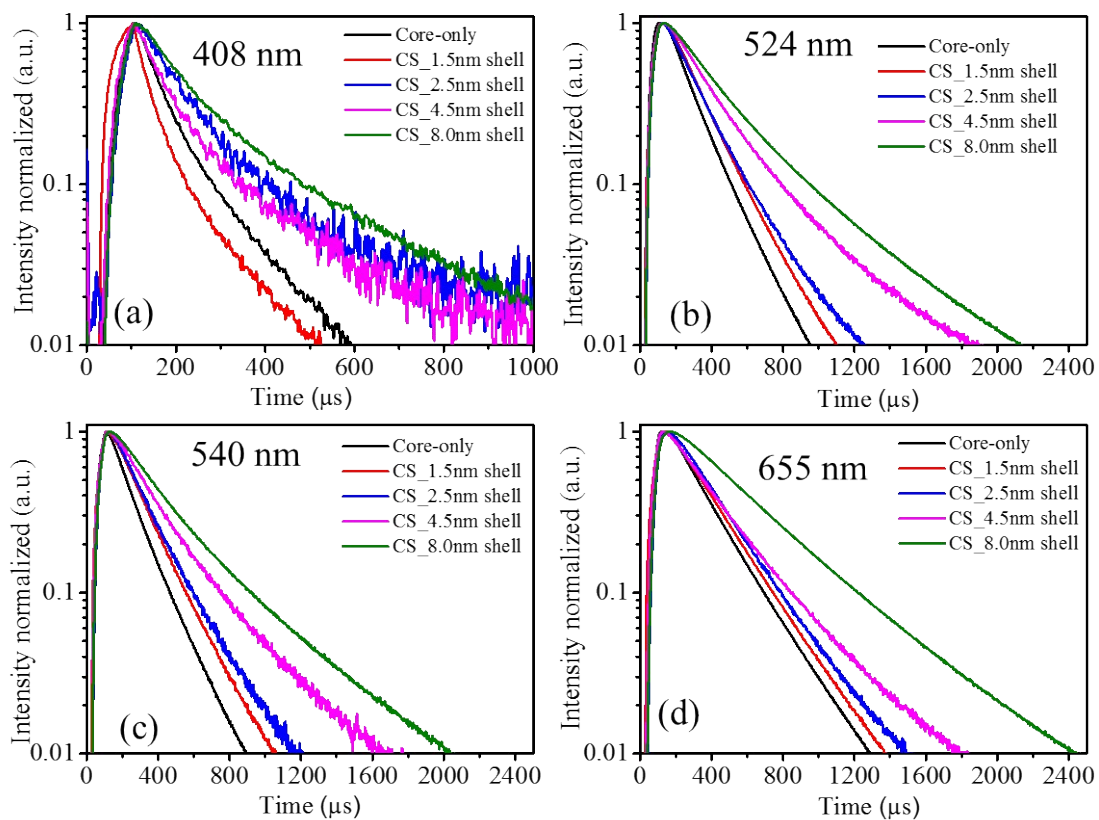

**Figure S4** Luminescence decay lifetimes from core and core-shell UCNP samples with different thickness of shells at emissions of 408nm (a), 524 nm (b), 540 nm (c) and 655 nm (d).

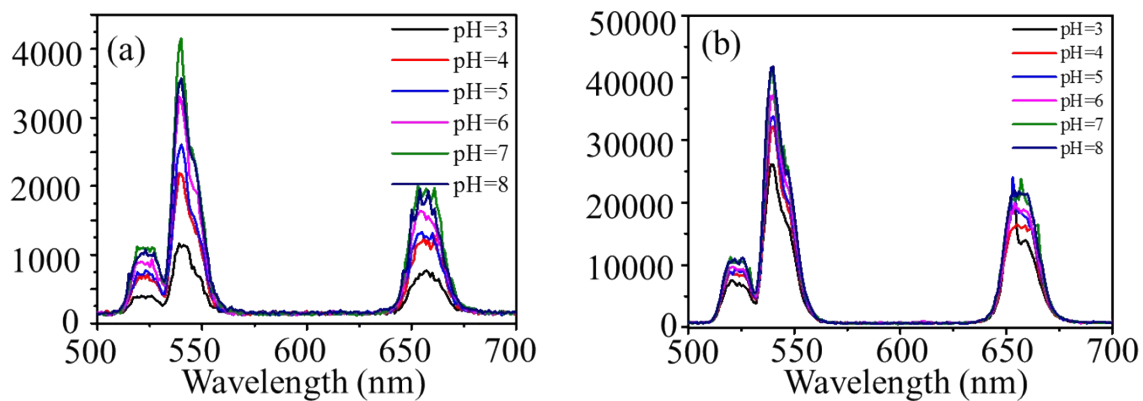

**Figure S5** Emission spectra of core-only (a) and core-shell UCNP samples (b) to study the shell impact on the luminescence stability in different pH solution.

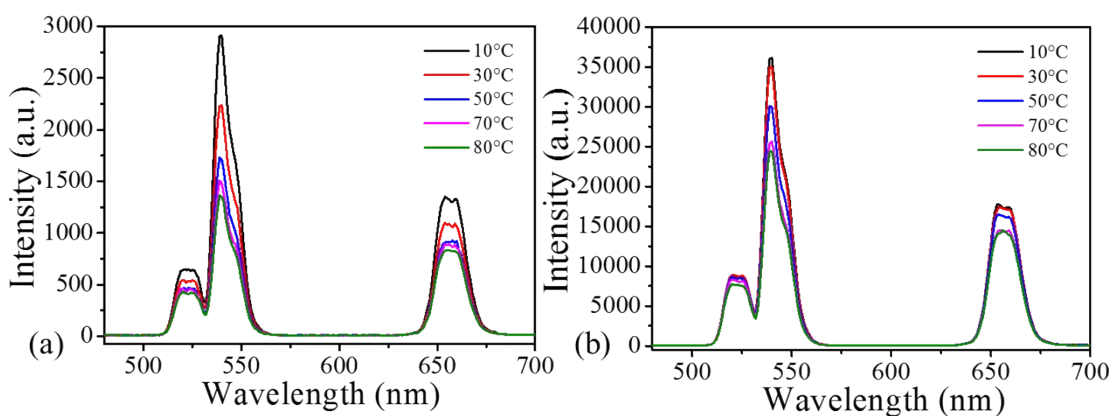

**Figure S6** spectra of core-only sample (a) and core-shell samples (b) to study the shell impact on the luminescence stability under varied temperature.
